# Supplementary material for: Association between blooming time and climatic adaptation in Prunus mume
Source: PubMed Central journal article supplement (PMC6972806; doi:10.1002/ece3.5894), 2019-12-20

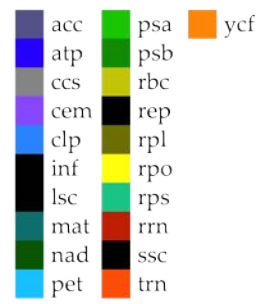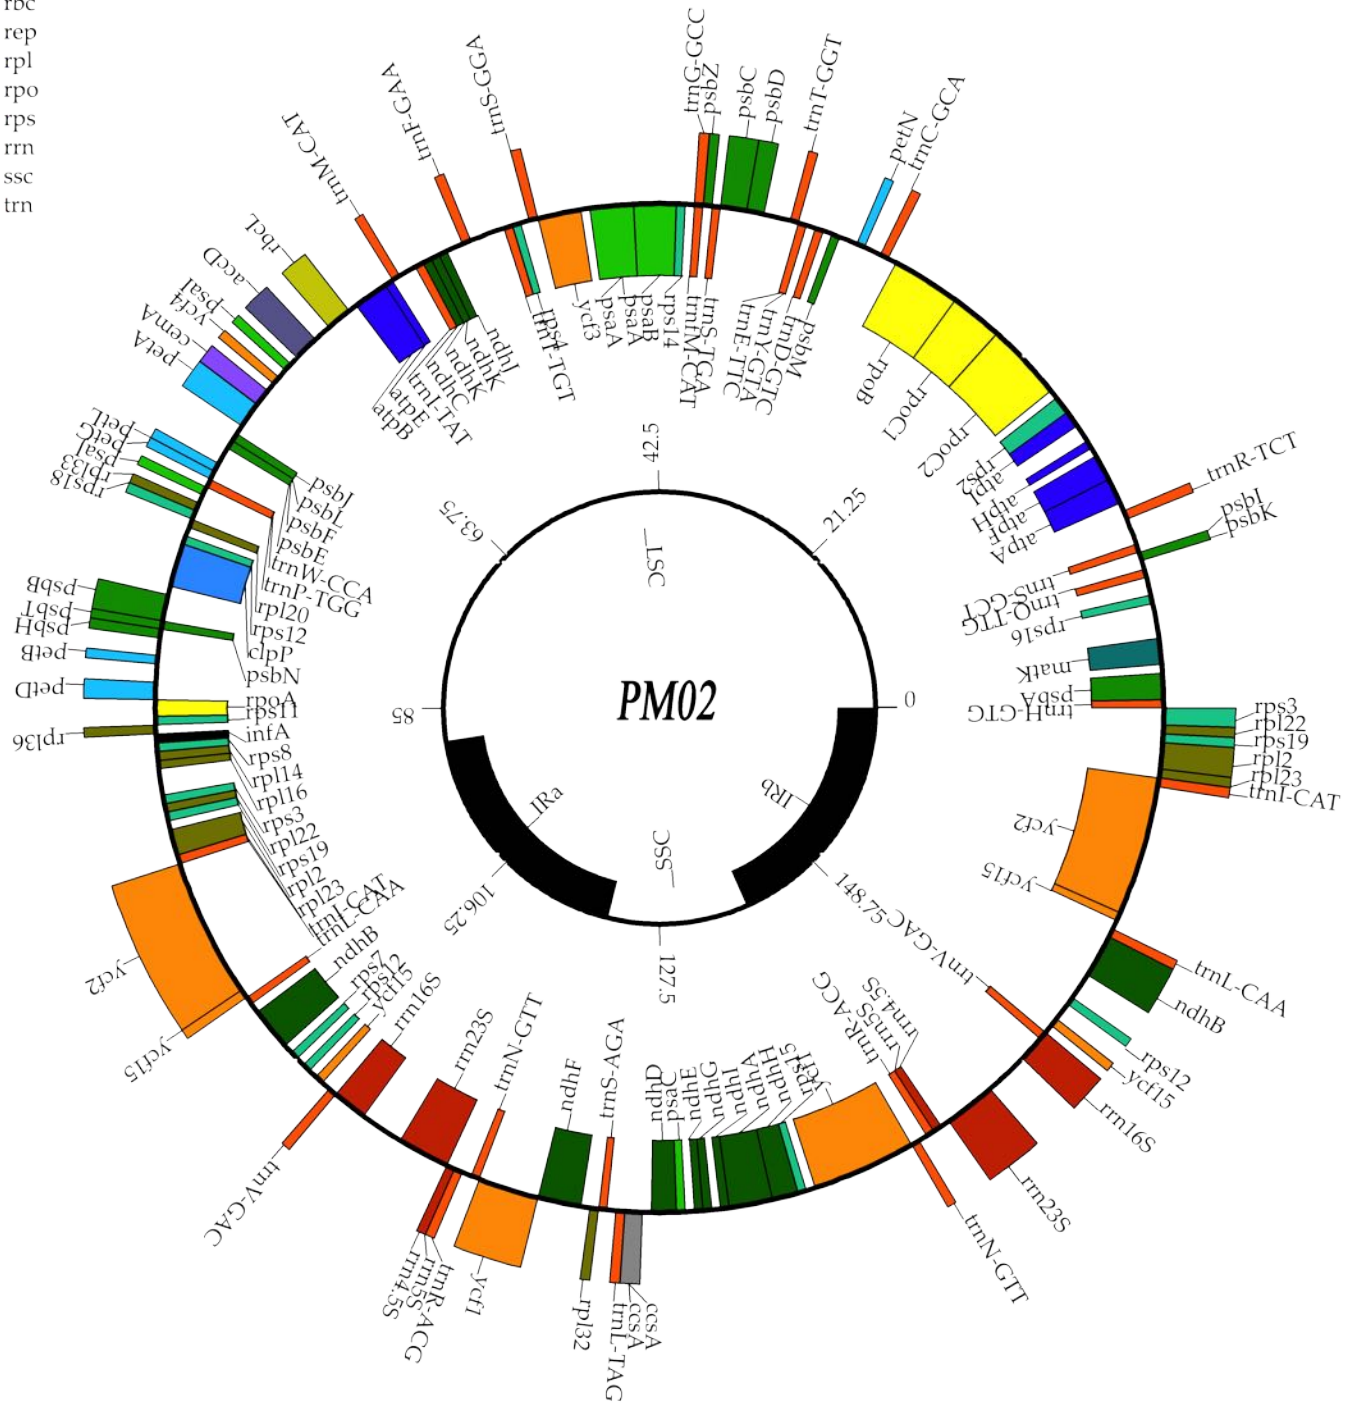





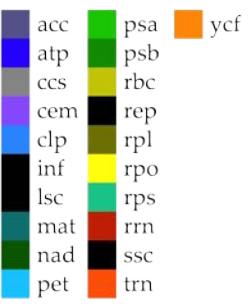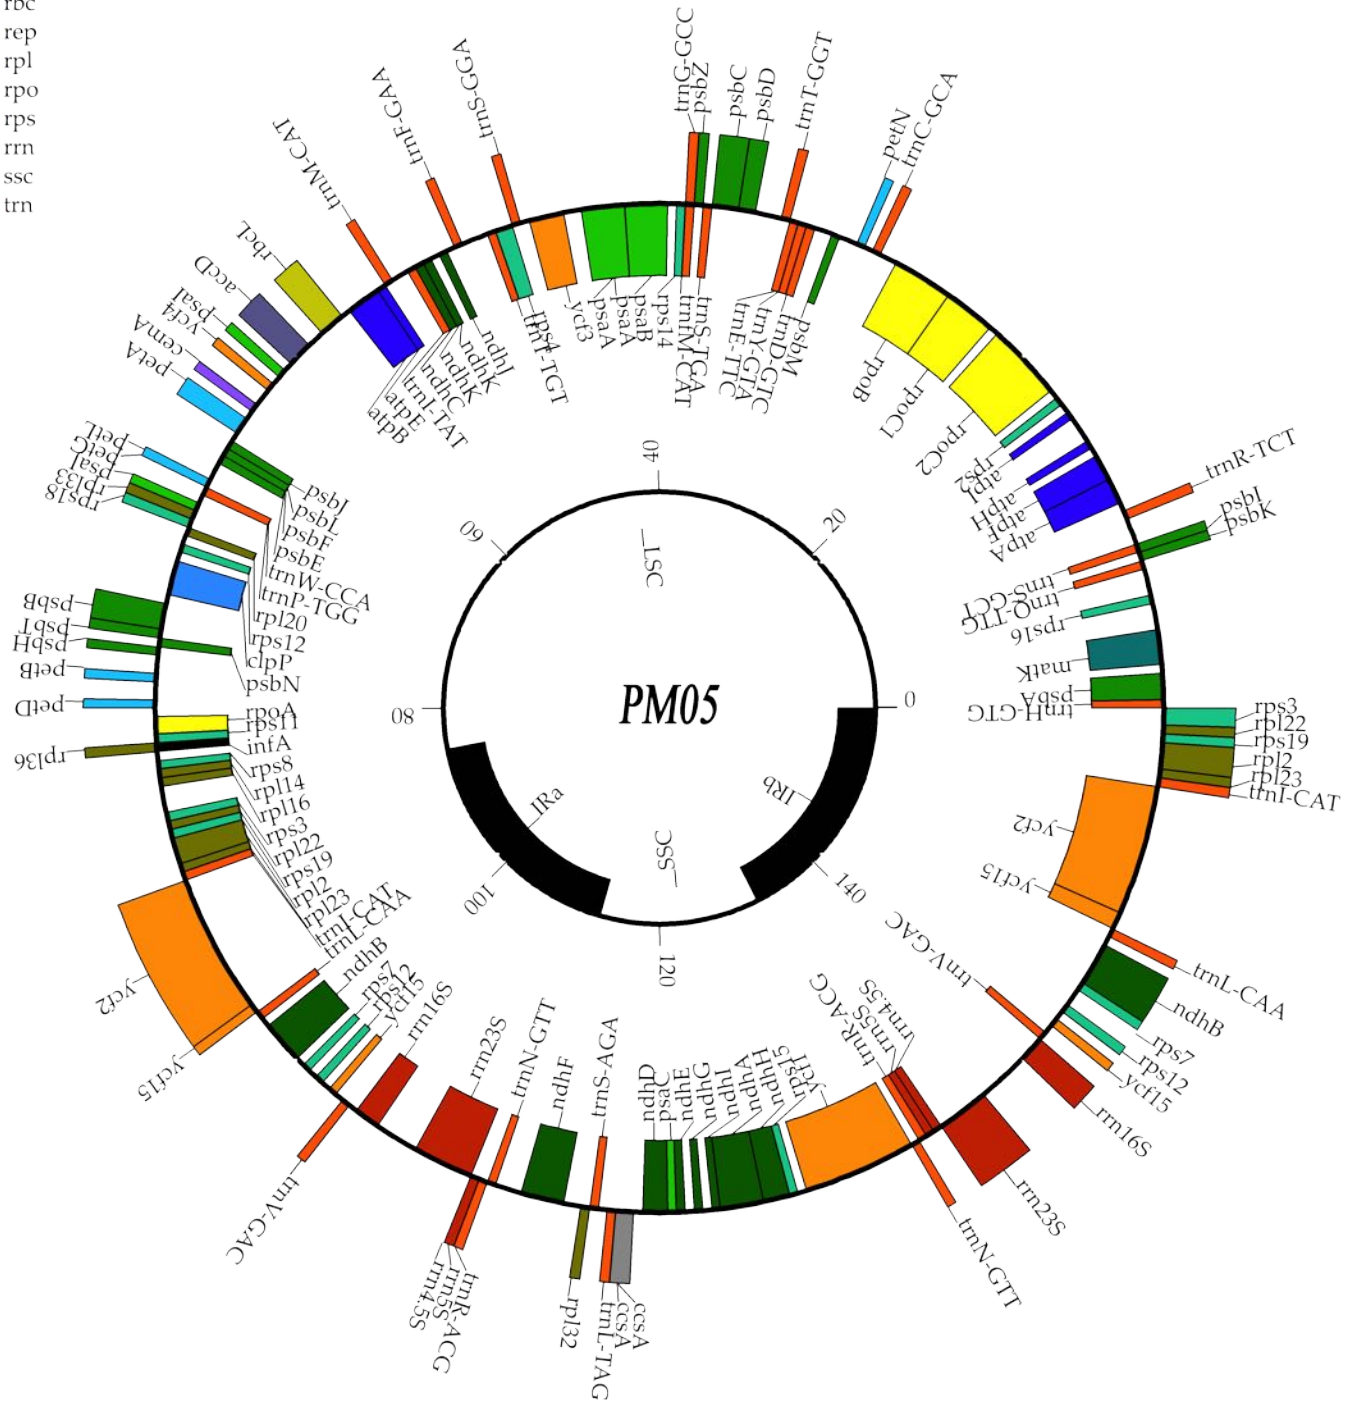



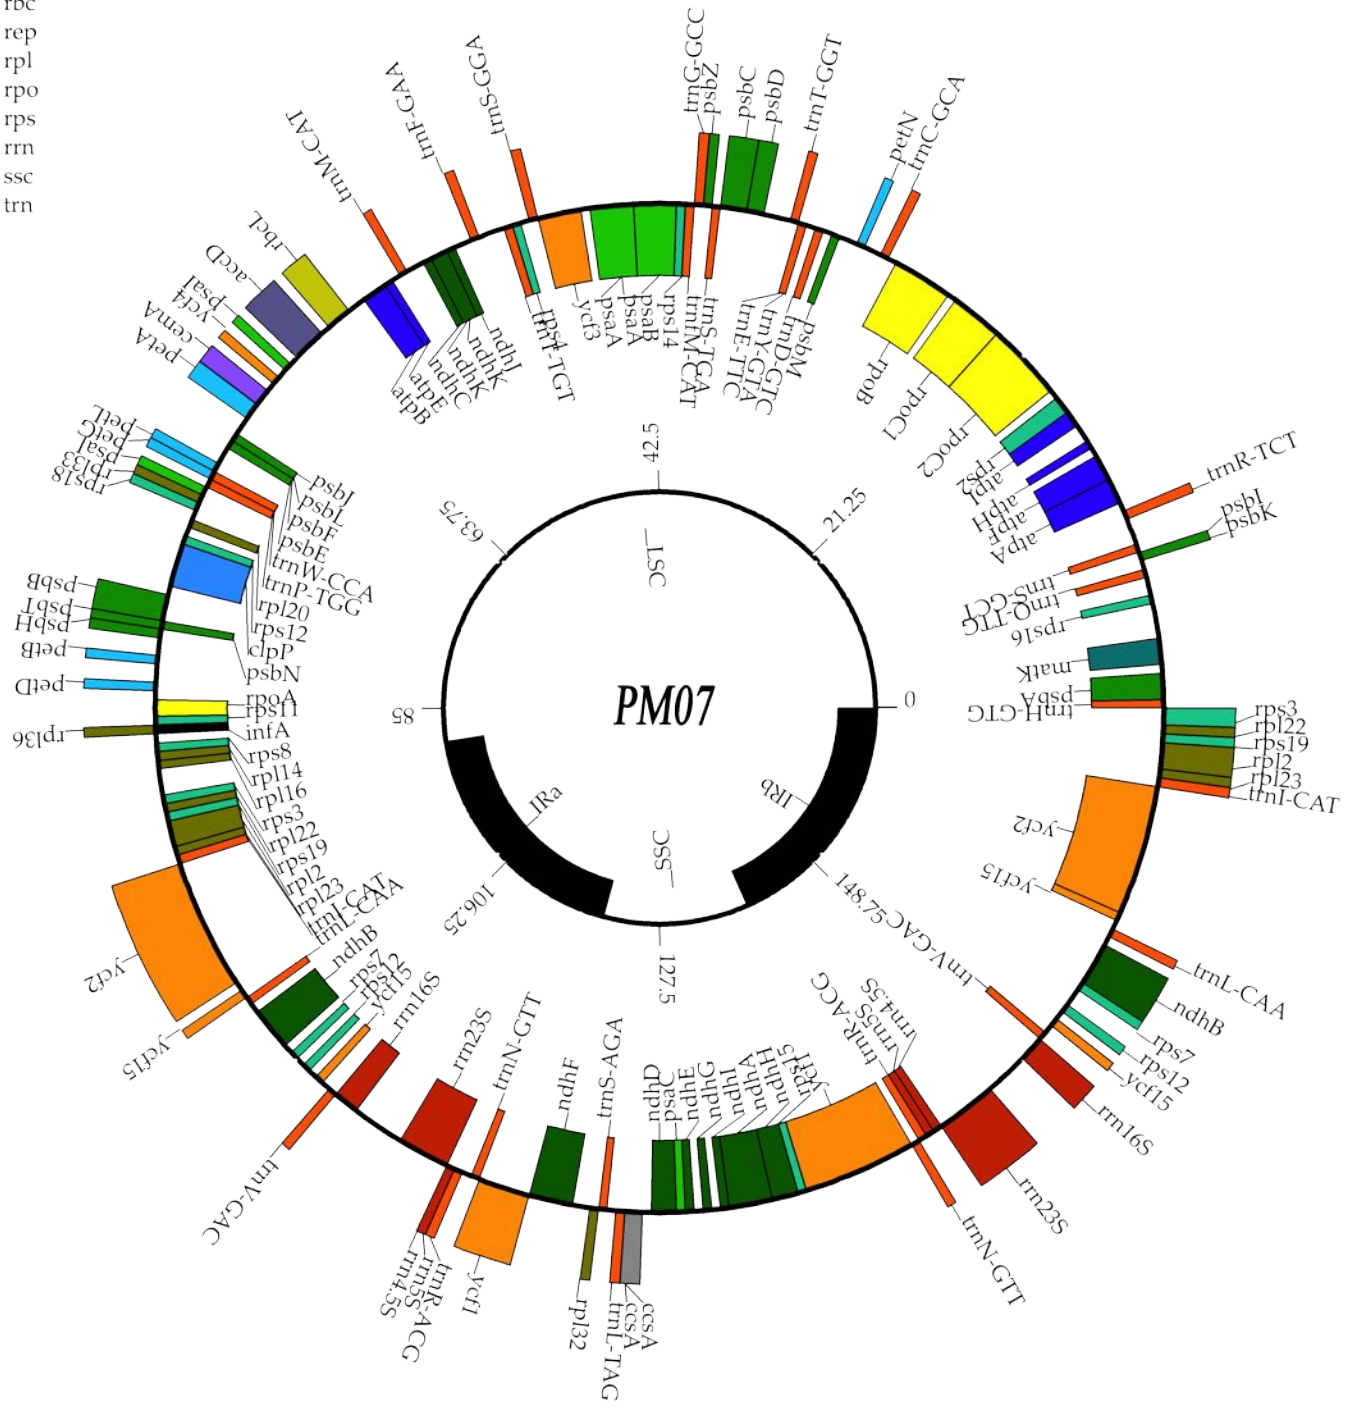





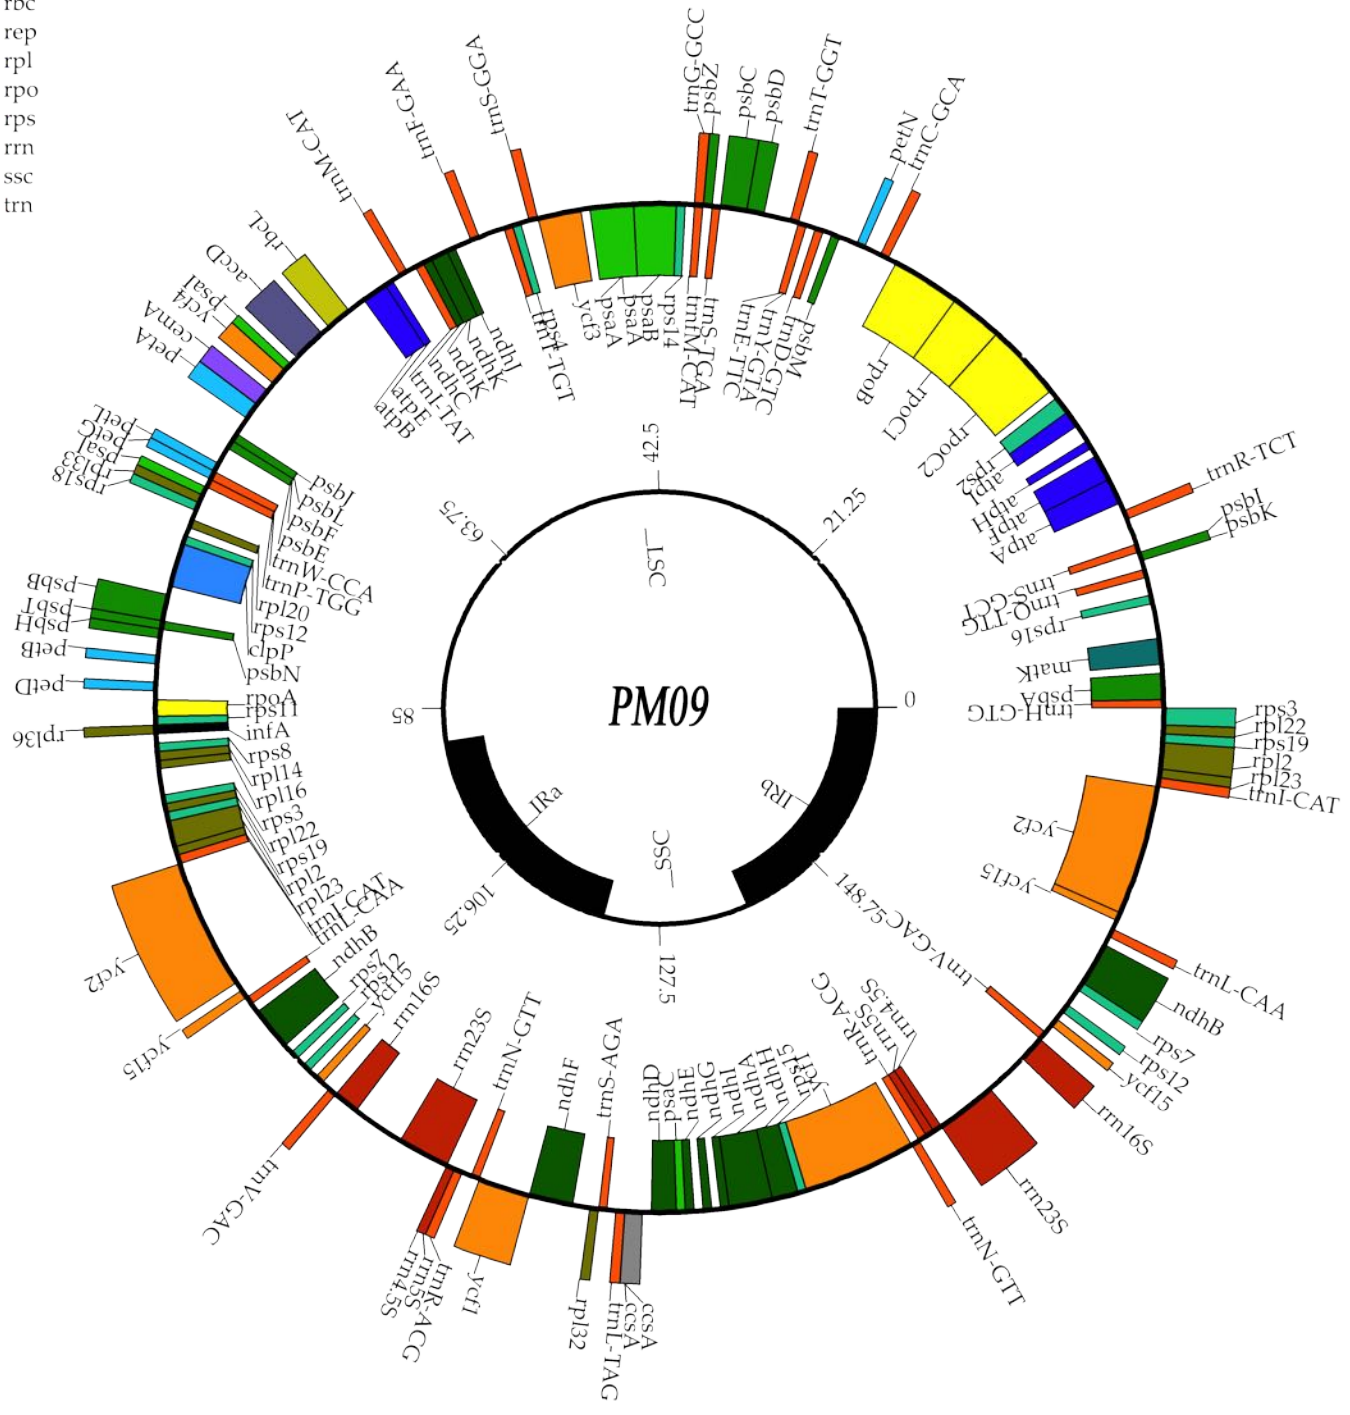

- acc
- atp
- ccs
- cem
- clp
- inf
- lsc
- mat
- nad
- pet
- psa
- psb
- rbc
- rep
- rpl
- rpo
- rps
- rrn
- ssc
- trn
- yef

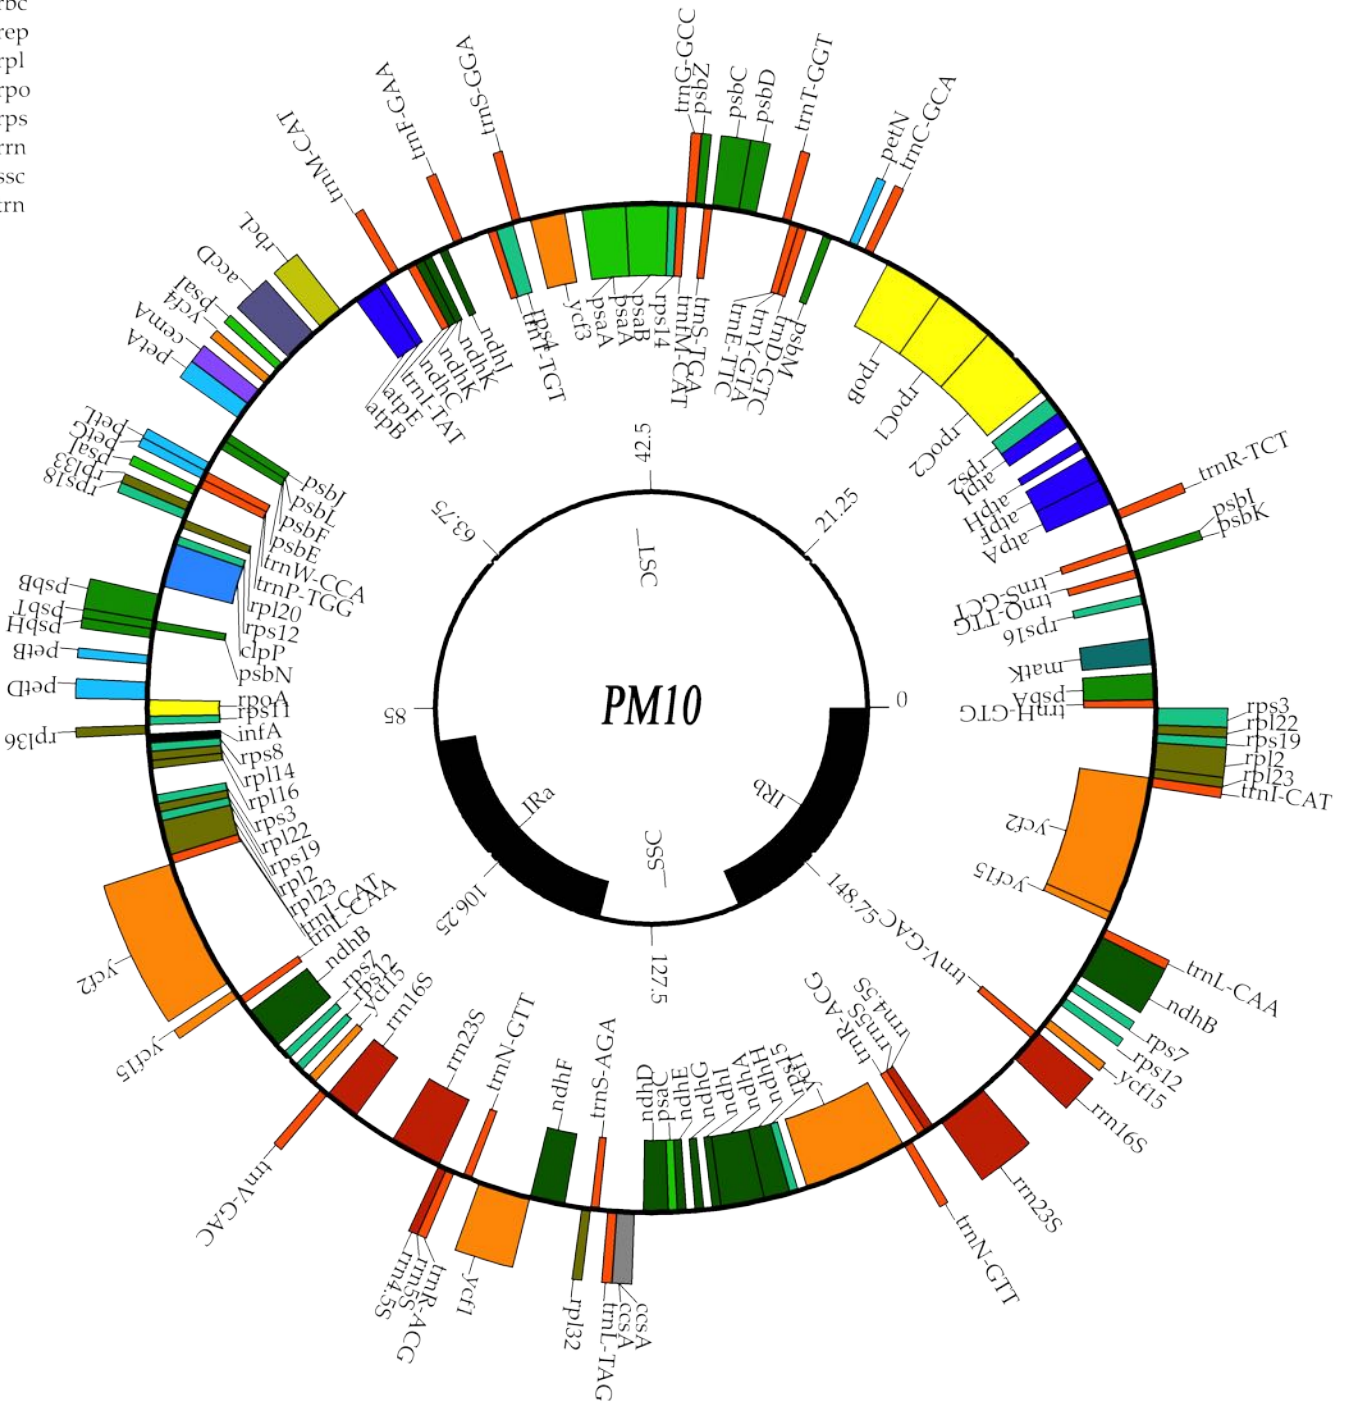

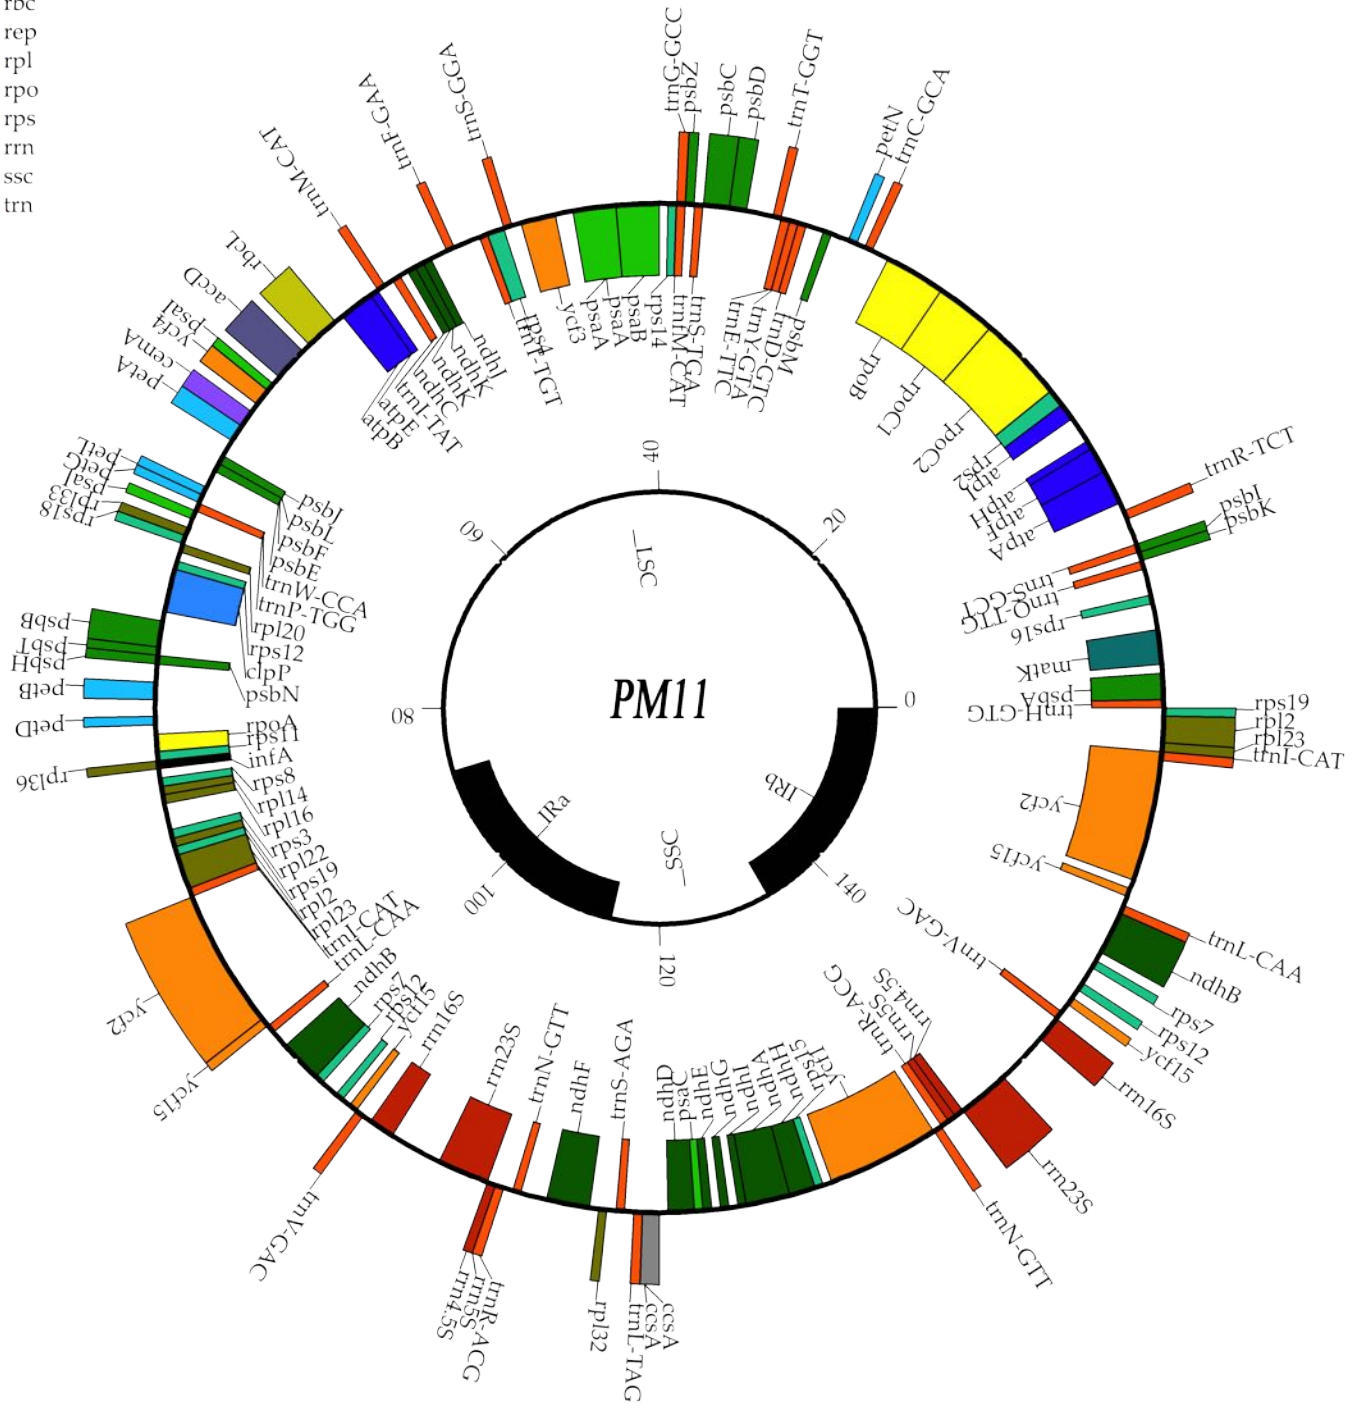

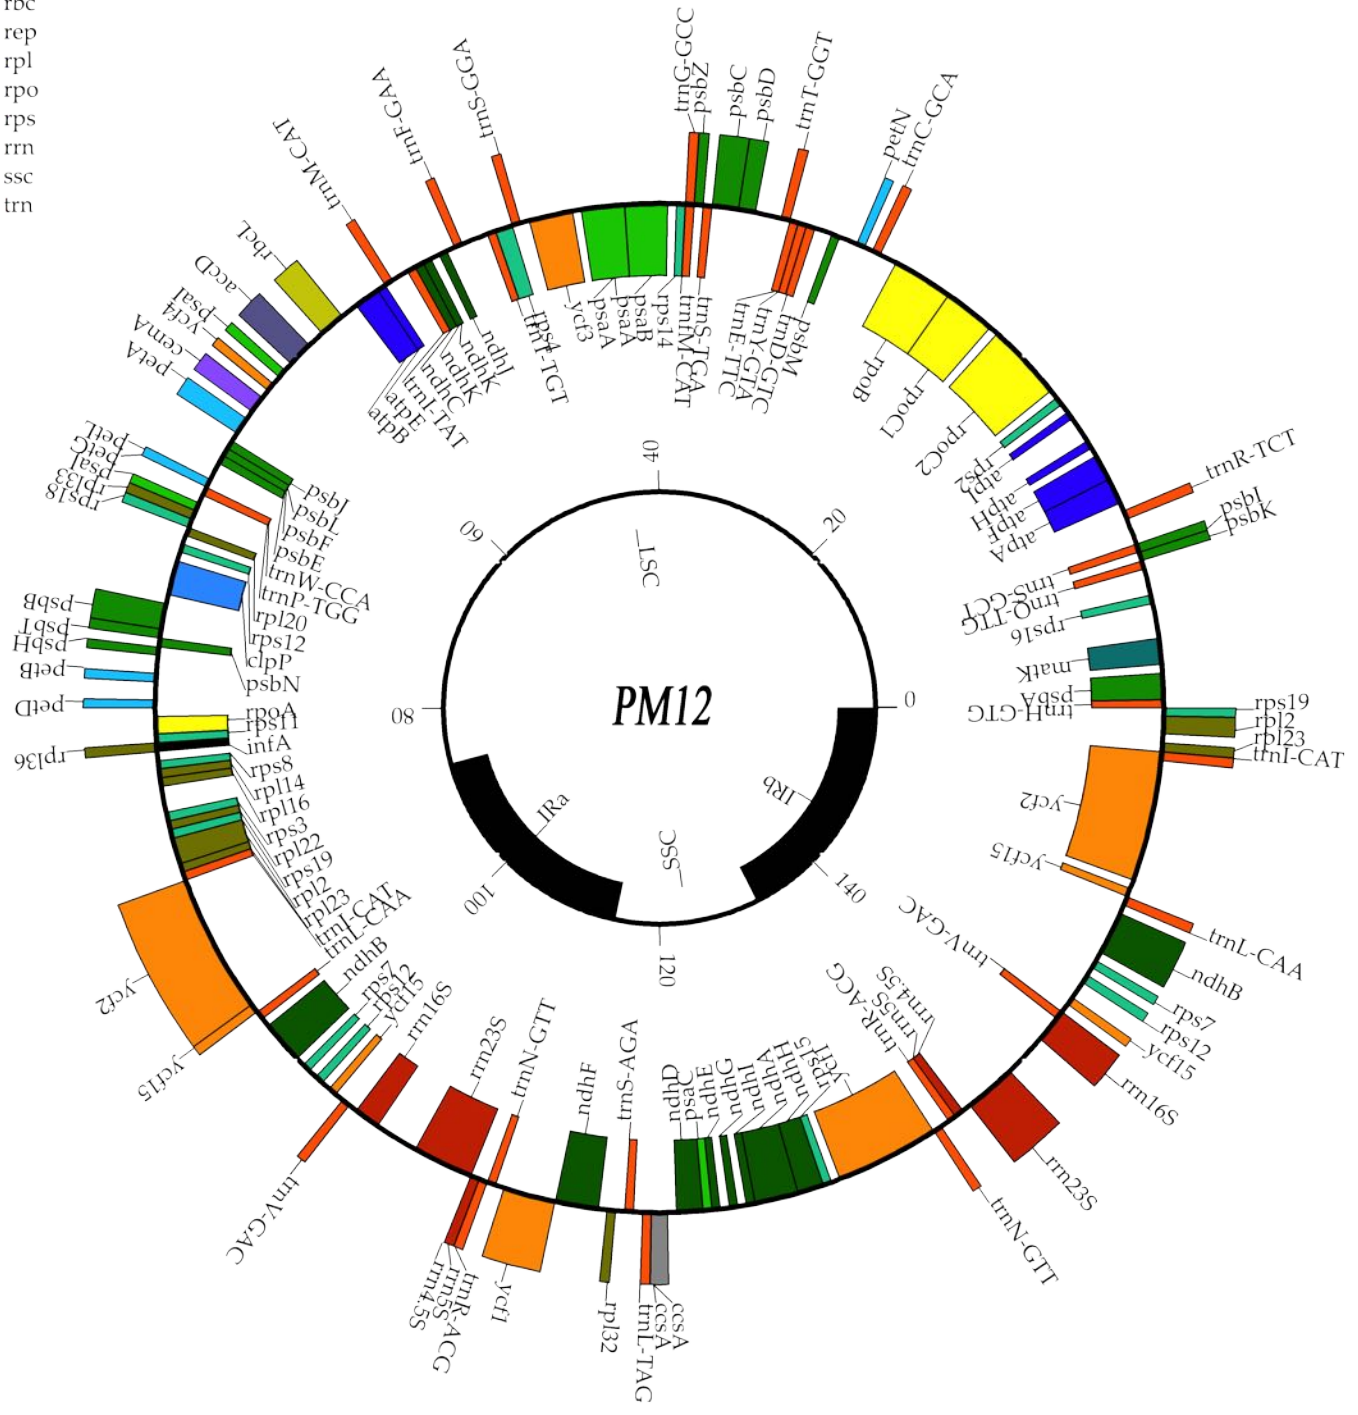



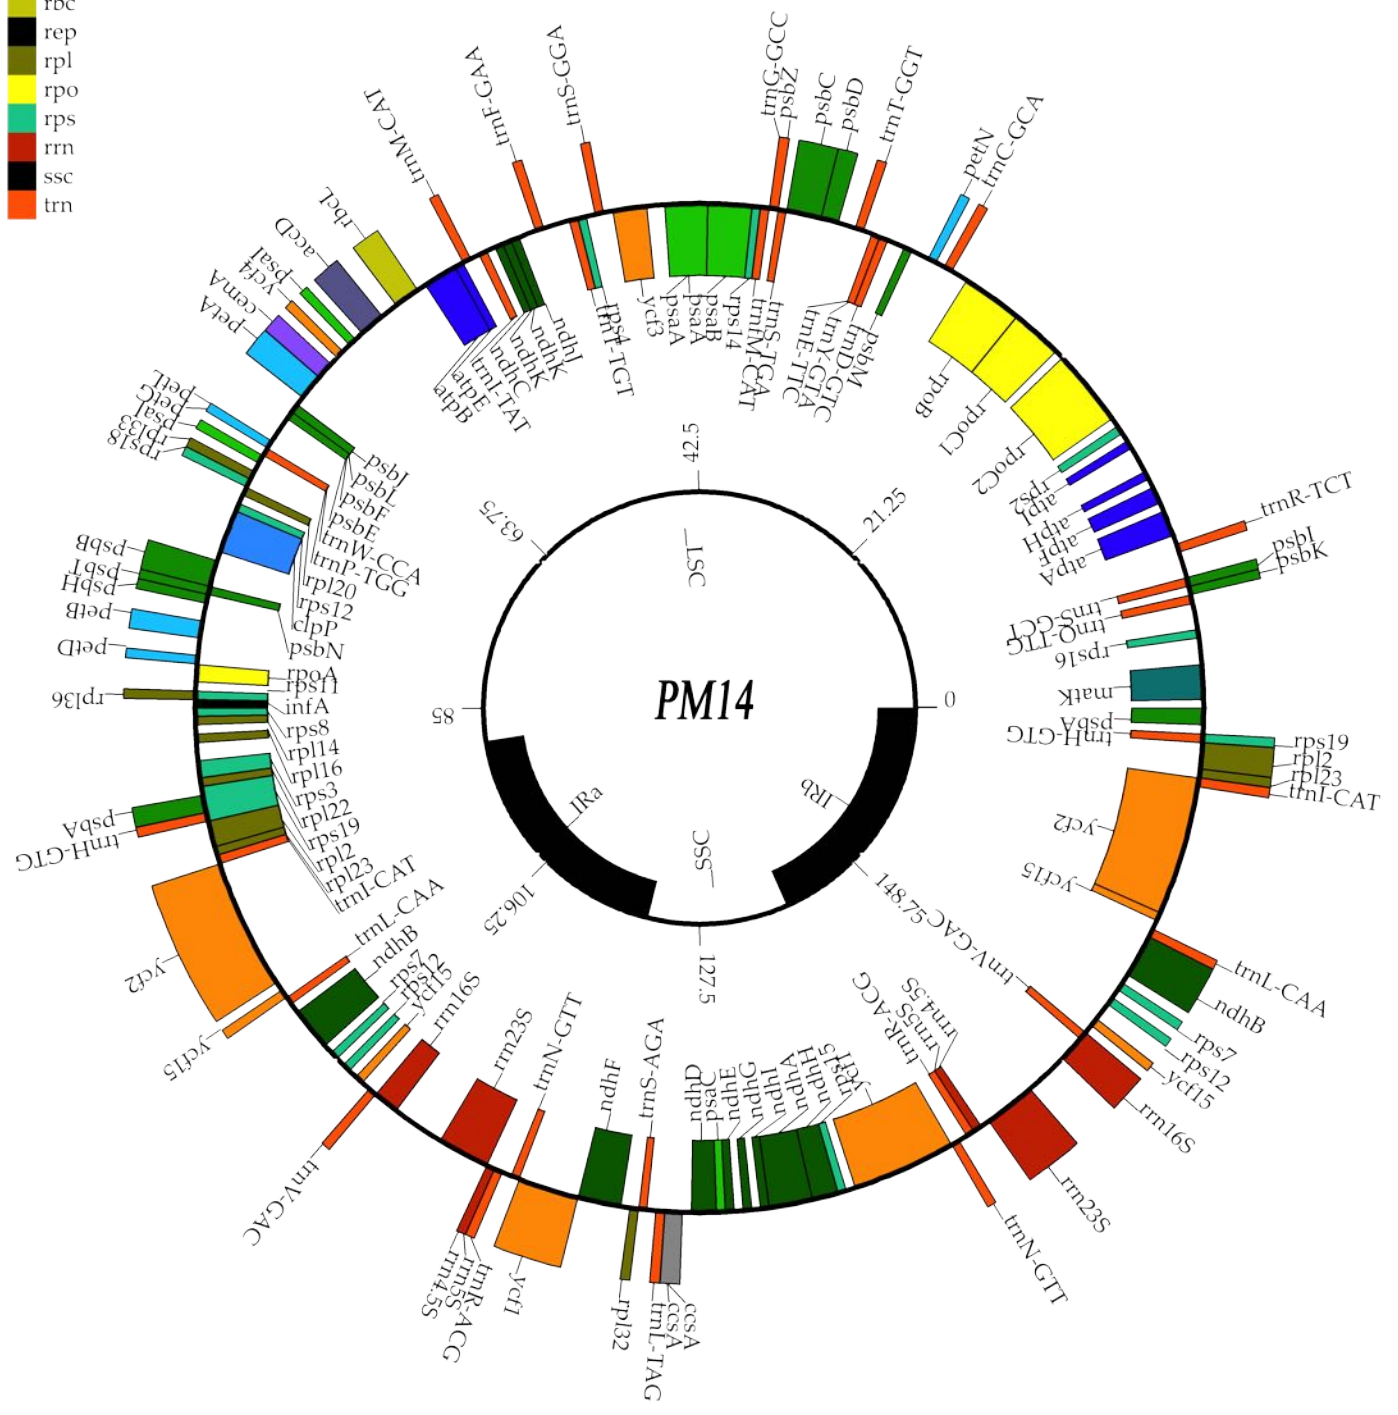

Supplement: ECE3-10-292-s003.pdf [file ECE3-10-292-s003.pdf]
